# Supplementary material for: Metabolic Alterations in Male-Sterile Potato as Compared to Male-Fertile
Source: MDPI journal article supplement (doi:10.3390/metabo9020024), 2019-02-01
Supplement: s1 [file s1]

Table S2. Characteristics of meiosis in *S. tuberosum* male sterile and fertile varieties

| Variety                       | Phase of meiosis | No of analyzed PMC | Number of normal PMC /% | Number of abnormal PMC / % | Type of abnormalities                                                           |
|-------------------------------|------------------|--------------------|-------------------------|----------------------------|---------------------------------------------------------------------------------|
| Lomonosovskij<br>male fertile | M I              | 186                | 105/56,4                | 81/43,6                    | 1-5 non oriented chromosomes<br>precocious chromosomes (1-2 pares)              |
|                               | A I              | 82                 | 44/53,7                 | 38/46,3                    | precocious, lagging chromosomes<br>(1-2 pares),<br>1-4 non oriented chromosomes |
|                               | T I              | 130                | 87/66,9                 | 43/33,1                    | 1-4 non oriented chromosomes                                                    |
|                               | M II             | 60                 | 43/71,7                 | 17/29,3                    | precocious, lagging chromosomes<br>(1-2);<br>1-4 non oriented chromosomes       |
|                               | A II             | 29                 | 21/72,4                 | 8/27,6                     | 2-4 non oriented chromosomes                                                    |
|                               | T II             | 92                 | 75/81,5                 | 17/18,5                    | 1-4 micronuclei                                                                 |
|                               | Tetrads          | 120                | 98/81,7                 | 22/18,3                    | Tetrads with 1-2 additional<br>microspores derived from<br>micronuclei          |
| Sudarynja<br>male sterile     | M I              | 358                | 198/55,3                | 160/44,7                   | 1-6 non oriented chromosomes;<br>precocious chromosomes (1-2<br>pares)          |
|                               | A I              | 86                 | 47/54,7                 | 39/45,3                    | precocious, lagging<br>chromosomes;<br>non oriented chromosomes (1-4);          |
|                               | T I              | 40                 | 34/85,0                 | 6/15,0                     | 1-4 non oriented chromosomes<br>lagging chromosomes(1-4)                        |
|                               | M II             | 37                 | 20/54,1                 | 17/45,9                    | 2-4 non oriented chromosomes                                                    |
|                               | A II             | 18                 | 11/61,1                 | 7/38,9                     | 2-4 non oriented chromosomes<br>lagging chromosomes                             |
|                               | T II             | 93                 | 58/62,4                 | 35/37,6                    | 1-4 micronuclei                                                                 |
|                               | Tetrads          | 163                | 138/84,7                | 25/15,3                    | Tetrads with 1-2 additional<br>microspores derived from<br>micronuclei          |
| Gusar<br>male sterile         | M I              | 598                | 538/90,0                | 60/10,0                    | 1-3 non oriented chromosomes<br>precocious chromosomes                          |
|                               | A I              | 329                | 306/93,0                | 23/7,0                     | 1-3 lagging chromosomes;<br>non oriented chromosome (1)                         |
|                               | T I              | 272                | 262/96,3                | 10/3,7                     | non oriented chromosome (1),<br>lagging chromosomes(1-4)                        |
|                               | M II             | 144                | 140/97,2                | 4/2,8                      | 1-2 non oriented chromosomes                                                    |
|                               | A II             | 51                 | 47/92,2                 | 4/7,8                      | 1-3 lagging chromosomes                                                         |
|                               | T II             | 34                 | 33/97,1                 | 1/2,9                      | 1 micrunucleus                                                                  |
|                               | Tetrads          | 88                 | 88/100,0                | 0/0,0                      |                                                                                 |

PMC – Pollen Mother Cells
