# Supplementary material for: Metabolic Alterations in Male-Sterile Potato as Compared to Male-Fertile
Source: MDPI journal article supplement (doi:10.3390/metabo9020024), 2019-02-01
Supplement: s1 [file s1]

Figure S3.

| cv. Lomonosovskij                                                                                                                                                                                                                                                                                                                                                                           | cv. Sudarynja                                                                                                                                                                                                                                                                                                                                                                                                                                                                                               | cv. Gusar                                                                                                                                                                                                                                                                                                                                                                 |
|---------------------------------------------------------------------------------------------------------------------------------------------------------------------------------------------------------------------------------------------------------------------------------------------------------------------------------------------------------------------------------------------|-------------------------------------------------------------------------------------------------------------------------------------------------------------------------------------------------------------------------------------------------------------------------------------------------------------------------------------------------------------------------------------------------------------------------------------------------------------------------------------------------------------|---------------------------------------------------------------------------------------------------------------------------------------------------------------------------------------------------------------------------------------------------------------------------------------------------------------------------------------------------------------------------|
| 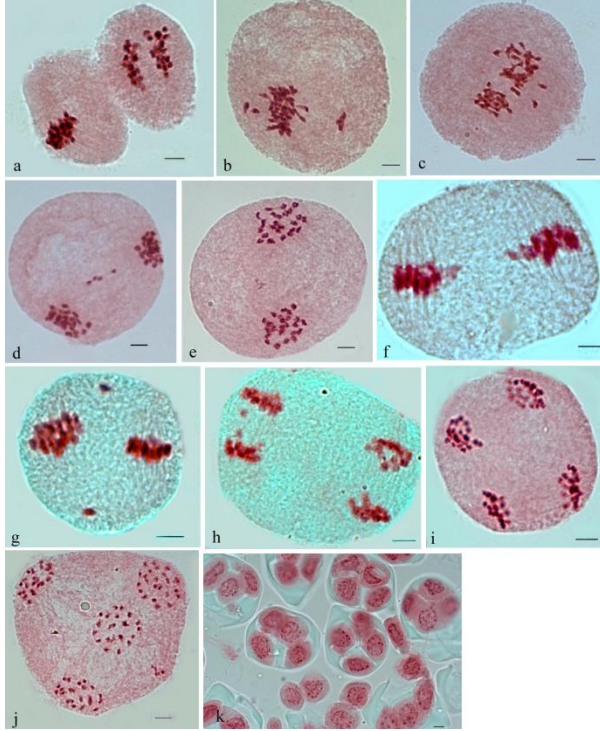                                                                                                                                                                                                                                                                                                            |                                                                                                                                                                                                                                                                                                                                                                                                                           |                                                                                                                                                                                                                                                                                        |
| <p>PMCs with (a) regular M I and AI;<br/> (b) 4 non oriented chromosomes at M1;<br/> (c) 2 lagging chromosomes at MI;<br/> (d) lagging chromosomes at TI;<br/> (e) normal TI;<br/> (f) regular MII;<br/> (g) 2 non oriented chromosomes at MII;<br/> (h) 2 lagging chromosomes at AII;<br/> (i) regular TII;<br/> (j) ) micronucleus formation at TII;<br/> (k) tetrads of microspores.</p> | <p>PMCs with (a) regular M I and AI;<br/> (b) PMC with 1 non oriented chromosome at M1;<br/> (c) 1 precocious chromosome at AI;<br/> (d) the normal T1; (e) lagging chromosomes at TI;<br/> (f) regular MII;<br/> (g) non oriented chromosomes at MII;<br/> (h) lagging chromosome at AII;<br/> (i) 2 non oriented chromosomes at AII;<br/> (j) micronucleus formation at TII; (k) normal TII;<br/> (l) tetrads of microspores;<br/> (m) tetrad with 1 additional microspores derived from micronuclei.</p> | <p>(a) PMC with regular M I;<br/> (b) the group of PMCs with regular MI, AI, TI and abnormal MI with 1 non oriented chromosome;<br/> (c) regular TI;<br/> (d) PMCs with regular TI and TI with 1 lagging chromosome;<br/> (e) TI with 1 non oriented chromosome;<br/> (f) regular MII;<br/> (g) regular AII;<br/> (h-i) regular TII;<br/> (j) tetrads of microspores.</p> |
