# Supplementary material for: Metabolic Alterations in Male-Sterile Potato as Compared to Male-Fertile
Source: MDPI journal article supplement (doi:10.3390/metabo9020024), 2019-02-01
Supplement: s1 [file s1]

Table S3. Morphological parameters of pollen grains in genotypes differed in its fertility/sterility status

|                         | Pollen grain size, $\mu\text{m}$ | Tetrads after acetolysis, % | Aperture number | Exine thickness, $\mu\text{m}$ |
|-------------------------|----------------------------------|-----------------------------|-----------------|--------------------------------|
| Genotype                | Average value $\pm$ SD           |                             |                 | Average value $\pm$ SD         |
| Male fertile genotypes  |                                  |                             |                 |                                |
| 1101/3                  | 25,20 $\pm$ 2.46                 |                             | 3 (2,4)         | 1,40 $\pm$ 0.45                |
| Lomonosovskij           | 26,28 $\pm$ 1.47                 |                             | 4 (3,2)         | 1,45 $\pm$ 0.33                |
| 211/9                   | 26,64 $\pm$ 2.62                 |                             | 4 (3)           | 1,34 $\pm$ 0.26                |
| 2103/7                  | 26,47 $\pm$ 2.34                 |                             | 4               | 1,37 $\pm$ 0.34                |
| Total fertile genotypes | 26.04 $\pm$ 0.24                 |                             |                 | 1.39 $\pm$ 0.02                |
| Male sterile genotypes  |                                  |                             |                 |                                |
| 1604/16                 | 22,92 $\pm$ 1.71                 | 11.9                        | not detected    | 2,18 $\pm$ 0.54                |
| Evraziya                | 22,74 $\pm$ 2.18                 | -                           | not detected    | 1,86 $\pm$ 0.52                |
| Sudarynja               | 24,90 $\pm$ 2.74                 | 6.3                         | not detected    | 2,99 $\pm$ 0.89                |
| Gusar                   | 22,98 $\pm$ 2.50                 | 0.9                         | not detected    | 2,57 $\pm$ 0.75                |
| Total sterile genotypes | 23.60 $\pm$ 0.23*                |                             | not detected    | 2.45 $\pm$ 0.06*               |

\*Differences between pollen grain size and exine thickness of fertile and sterile genotypes are significant ( $p < 0.001$ ).
