# Supplementary figures and images for: Metabolic Alterations in Male-Sterile Potato as Compared to Male-Fertile
Source: MDPI journal article supplement (doi:10.3390/metabo9020024), 2019-02-01

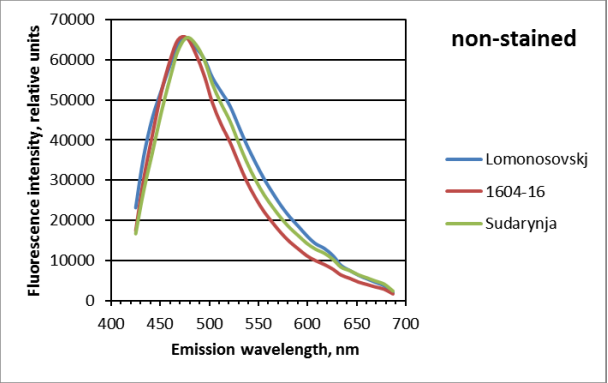

a

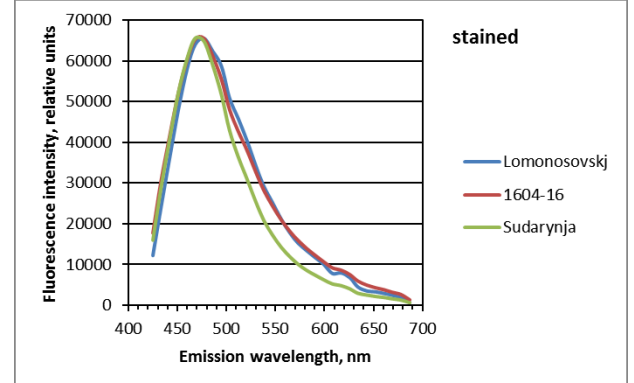

b

Supplement: s1 [file s1]
